# Supplementary material for: Finite Element Analysis of Strengthening Mechanism of Ultrastrong and Tough Cellulosic Materials
Source: Polymers (Basel). 2022 Oct 24;14(21):4490. doi: 10.3390/polym14214490 (PMC9654337; doi:10.3390/polym14214490)
Supplement: Supplementary file 1 [file polymers-14-04490-s001.zip › polymers-1974934-supplementary.pdf]

# Finite element analysis of strengthening mechanism of ultrastrong and tough cellulosic materials

Xiaoshuai Han<sup>1</sup>, Jingwen Wang<sup>1</sup>, Xiaoyi Wang<sup>1</sup>, Wei Tian<sup>1</sup>, Yanyan Dong<sup>2,\*</sup> and Shaohua Jiang<sup>1,\*</sup>

<sup>1</sup> Jiangsu Co-Innovation Center of Efficient Processing and Utilization of Forest Resources, International Innovation Center for Forest Chemicals and Materials, College of Materials Science and Engineering, Nanjing Forestry University, Nanjing, 210037, China.

<sup>2</sup> Institute of Environment and Sustainable Development in Agriculture, Chinese Academy of Agricultural Sciences, Beijing 100081, China.

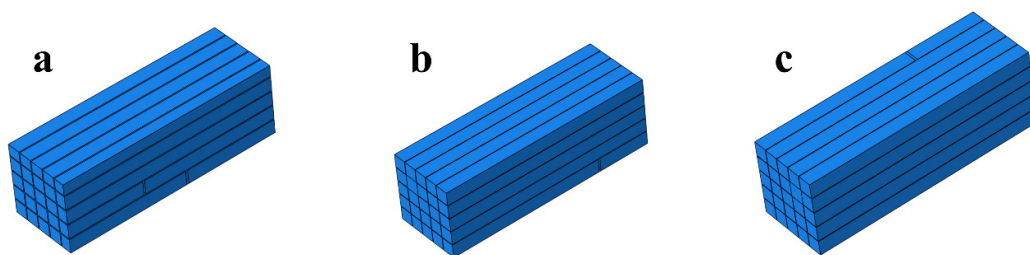

**Figure S1.** Representative bulk unit cell models of (a)  $CDW_{SD0}$ , (b)  $CDW_{SD9}$ , and (c)  $CDW_{SD18}$ .

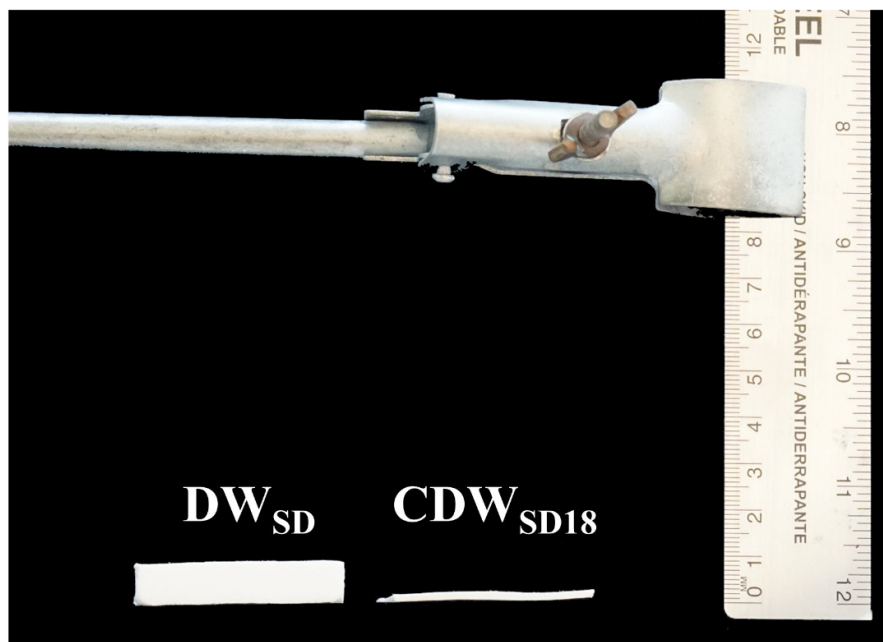

**Figure S2.** The photograph of  $DW_{SD}$  and  $CDW_{SD18}$ .
